# Supplementary material for: Atmospheric deposition of reactive nitrogen to a deciduous forest in the southern Appalachian Mountains
Source: Copernicus journal article supplement (doi:10.5194/bg-20-971-2023), 2023-03-09
Supplement: Supplementary file 1 [file bg-20-971-2023-supplement.pdf]

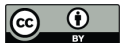

*Supplement of*

## **Atmospheric deposition of reactive nitrogen to a deciduous forest in the southern Appalachian Mountains**

**John T. Walker et al.**

*Correspondence to:* John T. Walker ([walker.johnt@epa.gov](mailto:walker.johnt@epa.gov))

The copyright of individual parts of the supplement might differ from the article licence.

24 **S1. Comparison of Measurement Methods for Wet Deposition and Air Concentrations**  
25 ***Concentrations of inorganic N in precipitation***

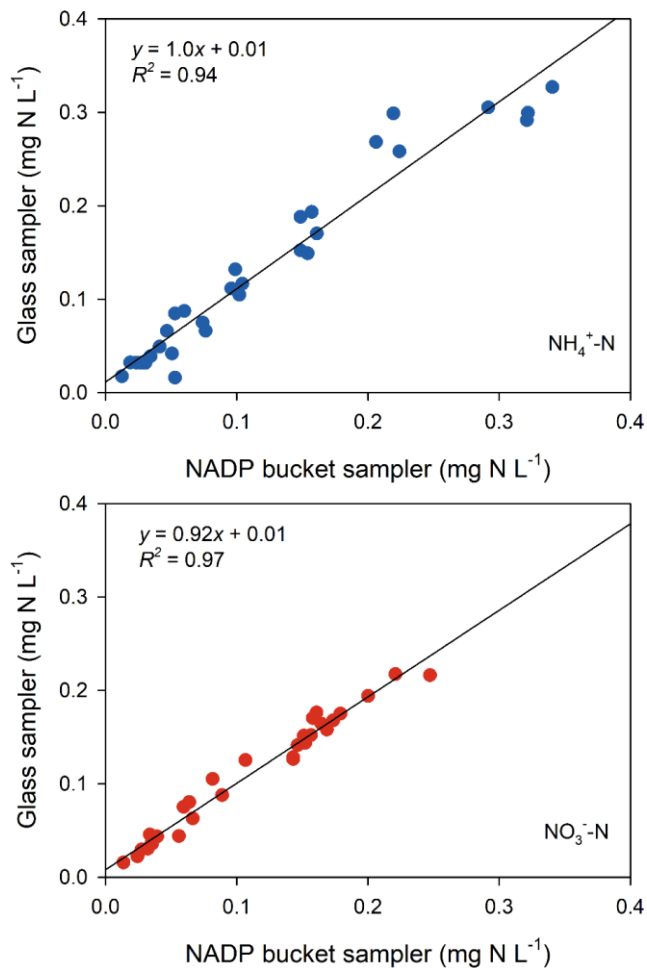

26  
27 **Figure S1. Comparison of  $\text{NH}_4^+$  (top) and  $\text{NO}_3^-$  (bottom) concentrations (as N) in weekly precipitation samples**  
28 **between SANDS glass precipitation sampler and standard weekly NADP/NTN polyethylene bucket.**  
29

30 ***Air concentrations of  $\text{HNO}_3$  and  $\text{NH}_3$***

31  $\text{HNO}_3$  and  $\text{NH}_3$  were measured by several methods during SANDS (Table 2), including continuous analyzers  
32 (MARGA and TD-PC-CL) and time integrated methods (URG denuder and CASTNET). Here we briefly compared  
33 the various methods, including those that were collocated at NC25/COW137 or operated concurrently at  
34 NC25/COW137 and the eddy flux tower (EFT) (Table 1). URG denuder/filter pack results were used as reference  
35 when available. Comparison to the collocated URG denuder (3- to 4-hour integration) on the EFT showed the  
36 MARGA underestimated  $\text{HNO}_3$  by approximately 22%, though the two methods were highly correlated (Figure S2).  
37 This underestimate could be caused by  $\text{HNO}_3$  sorption to the MARGA inlet, which is a 30 cm length of 1.27 cm O.D.  
38 PFA tubing. Conversely, TD-PC-CL  $\text{HNO}_3$  measured at NC25/COW137 was 23% higher than the URG denuder on

39 the EFT, again showing good correlation. TD-PC-CL compared well with CASTNET weekly  $\text{HNO}_3$  concentrations  
40 (August 2015 to August 2016), particularly when considering the low weekly average concentrations observed at  
41 Coweeta.

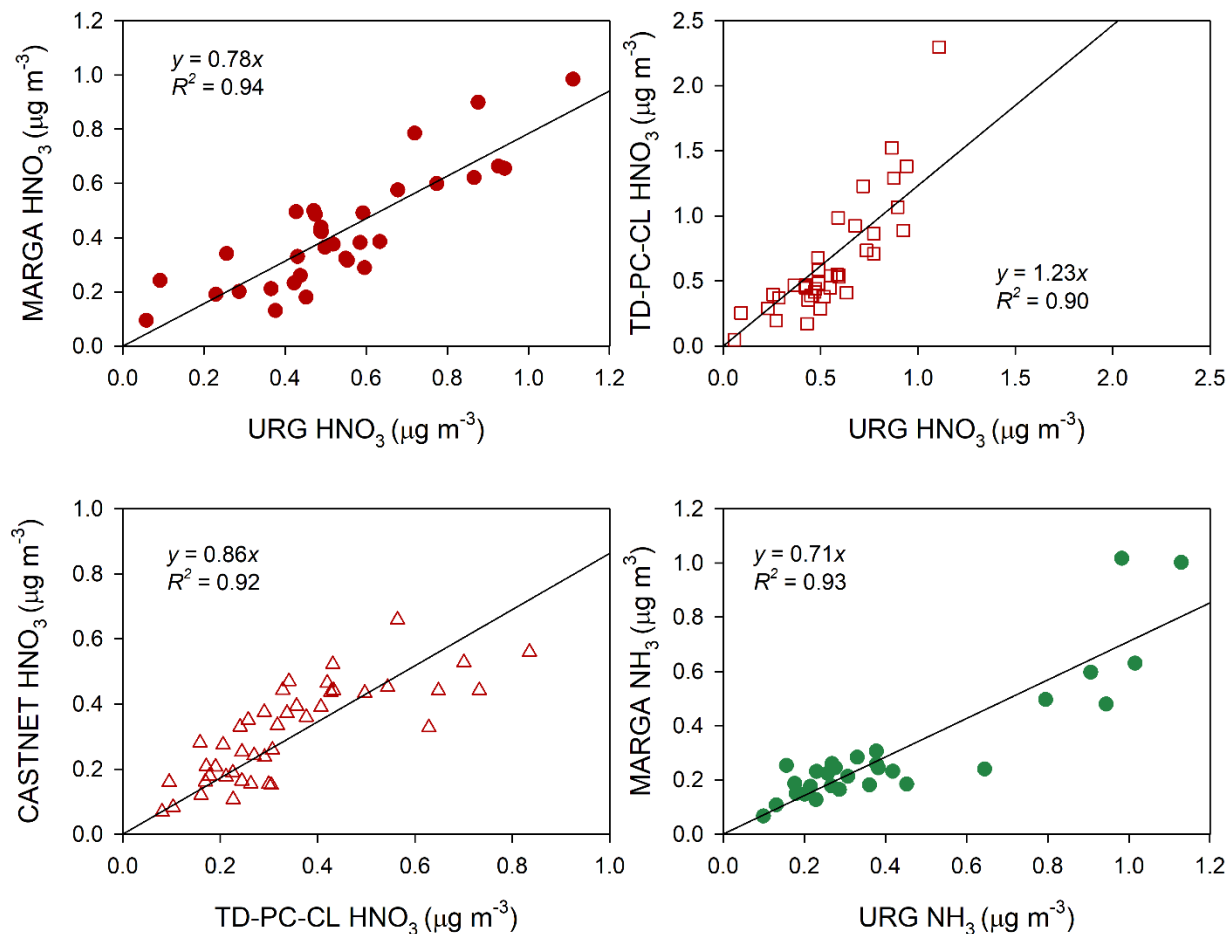

42  
43 **Figure S2. Comparison of  $\text{HNO}_3$  and  $\text{NH}_3$  measurements with regression results.**

44  
45 Comparison of hourly  $\text{HNO}_3$  concentration measured by TD-PC-CL and MARGA during spring and summer 2016 is  
46 presented in Figure S3. MARGA measurements reflect a measurement height of 37.5m during spring and 43.5m during  
47 summer. The methods tracked very well temporally, showing diurnal patterns with a peak during the mid-day and a  
48 minimum at night. However, the MARGA consistently measured lower mid-day peak  $\text{HNO}_3$  concentrations during  
49 both intensives. Similar to the MARGA underestimation relative to the URG denuder, this pattern may reflect loss of  
50  $\text{HNO}_3$  to the MARGA inlet. The disagreement is most pronounced during spring when relative humidity was higher,  
51 potentially causing more extensive sorption on tubing surfaces. Though less likely, overestimation by the TD-PC-CL  
52 method may occur if  $\text{NO}_y$  species other than  $\text{HNO}_3$  are scrubbed the KCl denuder (Section 2.2.2). Finally, the  
53 possibility that the difference between methods partly reflects real spatial differences cannot be ruled out. The  
54 MARGA system was deployed approximately 7.5 m (spring) and 13.5 m (summer) above the forest canopy

55 approximately 300 m to the southeast of the TD-PC-CL. The TD-PC-CL system was located in an open grassy area  
56 near the Coweeta offices and sampled from a height of 8 m above ground. Differences in dry deposition rates to the  
57 forest (higher) versus grassy area (lower) and potentially higher  $\text{NO}_2$  concentrations ( $\text{HNO}_3$  precursor) near the  
58 Coweeta offices may result in higher daytime  $\text{HNO}_3$  concentrations at the TD-PC-CL location.

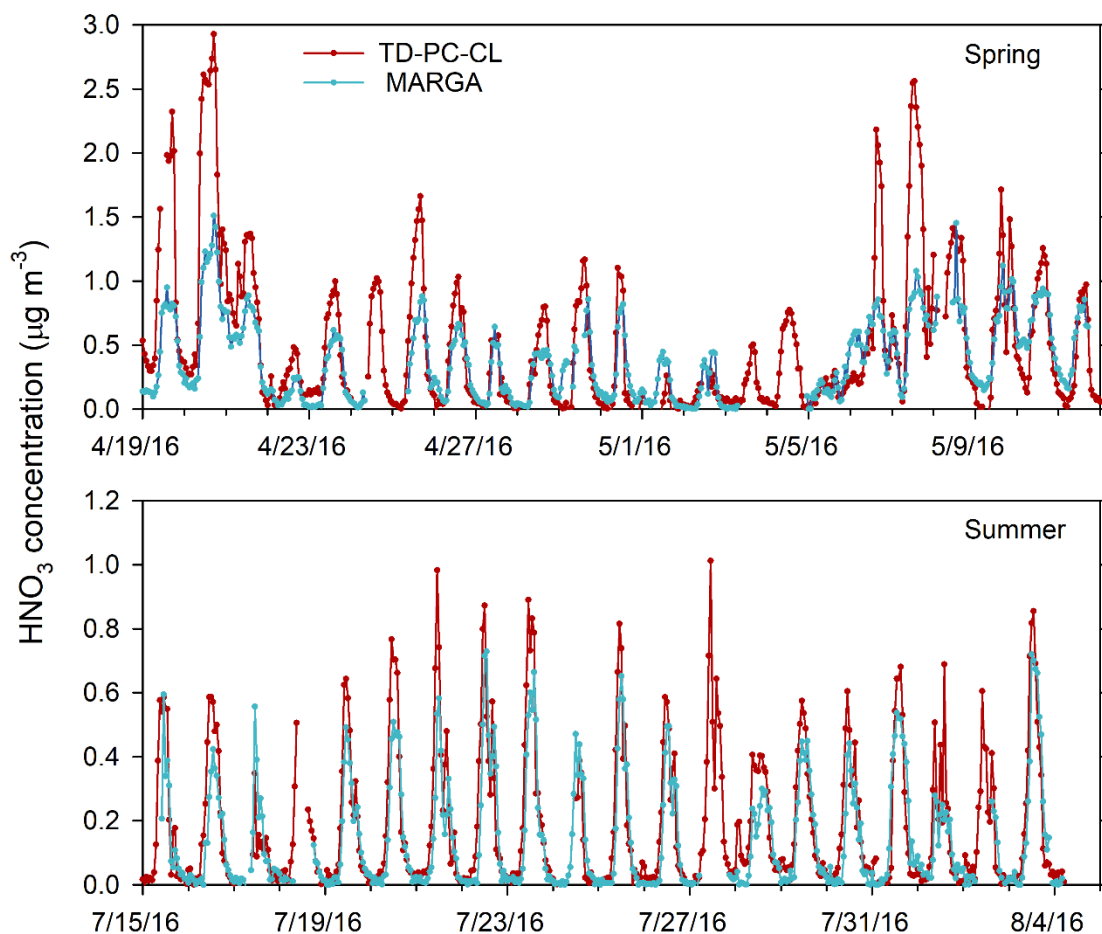

59  
60 **Figure S3. Time series of measured hourly  $\text{HNO}_3$  by MARGA and TD-PC-CL during spring and summer of**  
61 **2016.**

62  
63 Ammonia measured by the MARGA showed good correlation with the collocated URG denuder but underestimated  
64 by ~29% (Figure S2). Similar to  $\text{HNO}_3$ , this underestimation is attributed to  $\text{NH}_3$  loss to the MARGA inlet tubing.  
65 The bi-weekly integration period of the AMoN sample, and subsequent small sample size, precludes comparison to  
66 the seasonal intensive URG and MARGA measurements.

67  
68 ***Air concentrations of PM***

69

70 Comparison of particulate  $\text{SO}_4^{2-}$  and  $\text{NH}_4^+$  concentrations measured by Tisch Hi-Vol  $\text{PM}_{2.5}$  and CASTNET samplers  
71 is presented in Figure S4. 24-hr Tisch Hi-Vol measurement data were averaged to match the weekly CASTNET  
72 measurements. Data points with completeness less than 75% were excluded from comparison. The methods compared  
73 well overall, exhibiting high correlation and offsets near zero. CASTNET concentrations were  $\sim 15\%$  higher, on  
74 average, than Hi-Vol concentrations. Both methods (not shown) measured very low concentrations of  $\text{NO}_3^-$  during the  
75 periods of comparison. While typically found mostly in the fine mode, differences in  $\text{SO}_4^{2-}$  and  $\text{NH}_4^+$  may be partly  
76 attributed to measurement of different particle sizes. CASTNET does not have a size selective inlet while the Hi-Vol  
77 measures  $\text{PM}_{2.5}$ . Thus, CASTNET samples some portion of the coarse particle fraction. The observation that  
78 particulate  $\text{NO}_3^-$  by CASTNET sampler was higher than the Hi-Vol (average of  $0.14$  and  $0.018 \mu\text{g m}^{-3}$ , respectively)  
79 also suggests the collection of some coarse nitrate by CASTNET. Differences in  $\text{NH}_4^+$  and  $\text{NO}_3^-$  may also relate to the  
80 flow rate of the two samplers. The significantly higher flow rate of the Hi-Vol sampler ( $230 \text{ L min}^{-1}$ ) may promote  
81 greater volatilization of  $\text{NH}_4\text{NO}_3$  than CASTNET ( $1.5 \text{ L min}^{-1}$ ).

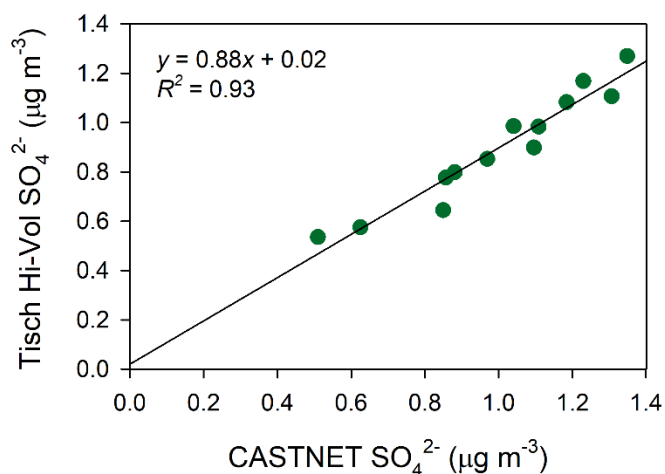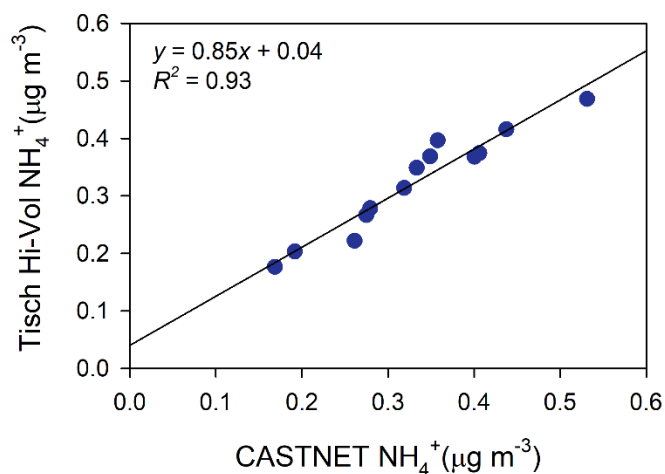

82  
83 **Figure S4. Comparison of particulate  $\text{SO}_4^{2-}$  and  $\text{NH}_4^+$  concentrations measured by co-located Tisch Hi-Vol**  
84  **$\text{PM}_{2.5}$  and CASTNET samplers.**

85

### 86 **Passive HNO<sub>3</sub> sampler**

87 In order to quantify ambient HNO<sub>3</sub> concentrations with the passive samplers, a calibration was conducted by  
88 comparing the passive sampler with a collocated CASTNET filter pack sampler at Screwdriver Knob. A median  
89 “effective” passive sampling rate was calculated over the full collocation period. The calibrated passive  
90 measurement is compared to the collocated filter pack measurement in Figure S5. Average(median) concentrations  
91 of the data shown in the graph are 0.1(0.1) and 0.1(0.1) μg m<sup>-3</sup> for the passive and filter pack, respectively. The  
92 sampling rate was applied to the passive HNO<sub>3</sub> samplers deployed across the basin (Figure 1, Table 1, Figure 13).

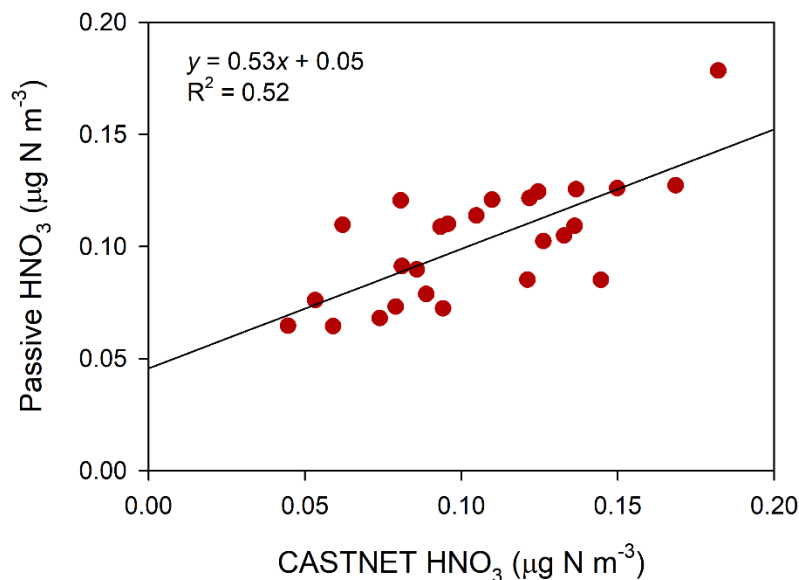

93

94 **Figure S5. Comparison of calibrated passive and CASTNET HNO<sub>3</sub> at Screwdriver Knob**

95

### 96 **S2. TD-PC-CL Instrument**

97

98 The thermal decomposition, photolytic conversion, chemiluminescence (TD-PC-CL) instrument at Coweeta used a  
99 10 cm long 0.635 cm O.D. PFA Teflon inlet line, a 0.5 L PFA ballast tank, three 30 cm long by 0.5 cm diameter quartz  
100 converter tubes and three model BLC2 second generation blue LED converters (Air Quality Design, Inc., Wheat  
101 Ridge, CO) to sample inlet air, thermally convert total peroxy nitrates (ΣPNs) and total alkyl nitrates (ΣANs) to NO<sub>2</sub>  
102 and then photolyze NO<sub>2</sub> to NO. The inlet was mounted approximately 8 m above ground level and 5 m horizontal  
103 distance from the equipment shelter. Ambient air was drawn through a single inlet line into the ballast tank where  
104 flow was split into three separate channels. The purpose of the ballast tank was to provide approximately 16 seconds  
105 residence time to the system in order to smooth the signal as the analyzer switches between channels. Channel 1 air  
106 (baseline) flowed into a quartz converter tube maintained at shelter temperature. From there, the sample entered the  
107 pre-reactor channel of a Thermo-Environmental Model 42i NO-NO<sub>x</sub> analyzer and the ambient NO<sub>2</sub> plus analyzer

108 background signal was measured. In normal operation, the pre-reactor in the Model 42i was used to measure signal  
109 from instrument background plus non-NO interferences. For this application, the O<sub>3</sub> feed to the pre-reactor was  
110 disconnected so that it could function as an independent measurement channel. The baseline signal from Channel 1  
111 measured instrumental noise, plus chemical interferences, plus NO and NO<sub>2</sub>.

112 Channel 2 air was directed through a quartz converter tube heated to 180 °C. Air from the converter then flowed  
113 through 10 cm of 0.635 cm O.D. stainless steel tubing to cool the sample, then into a second blue LED converter and  
114 finally the NO channel of the NO-NO<sub>x</sub> analyzer. Channel 2 thus measures baseline plus ΣPNs. Channel 3 air  
115 followed an identical path, except the quartz converter was heated to 360°C, then into the blue LED and the NO<sub>x</sub>  
116 channel of the analyzer. Channel 3 measured baseline plus ΣPNs plus ΣANs.

117 Prior to deployment, the NO-NO<sub>x</sub> detector was calibrated with NIST-traceable NO (Scott-Marrin, Riverside, CA) and  
118 conversion factors for the blue LEDs were determined with NO<sub>2</sub> (Scott-Marrin). Challenges with isopropyl nitrate  
119 (Scott-Marrin) concentrations between 2 and 40 parts per billion (ppb) showed no response on either Channel 1 or  
120 Channel 2 and 96±2 % recovery on Channel 3. Post-deployment challenges with isopropyl nitrate showed slightly  
121 lower recoveries on Channel 3 (i.e., 94 ±3 %).

122 In the field, detector responses and converter efficiencies were checked with NO and NO<sub>2</sub>, respectively, every three  
123 days. Zero air zeros and dynamic zeros (heaters turned off) were performed every 3 days and 7 days, respectively.  
124 Both types of zeros indicated 1-sigma detection limits of 0.018-0.027 ppb. Data processing involved acquisition of  
125 signals from all three channels with 1-minute time resolution, followed by averaging to 5-minute intervals and  
126 adjustment of each channel for NO<sub>2</sub> response. PN<sub>s</sub> were then calculated as the difference between adjusted Channel  
127 2 and adjusted Channel 1, and AN<sub>s</sub> were calculated as the difference between adjusted Channel 3 and adjusted Channel  
128 2.

129

130

131

132

133

134 **Table S1. Species list, basal area, and maximum leaf area index, based on allometric equations from four 25 ×**  
 135 **25 m plots near the base of the EFT, sorted by leaf area index (Oishi et al., 2018).**

| Scientific name                     | Common name                  | Basal area<br>(m <sup>2</sup> ha <sup>-1</sup> ) |        | Leaf area index<br>(m <sup>2</sup> m <sup>-2</sup> ) |        |
|-------------------------------------|------------------------------|--------------------------------------------------|--------|------------------------------------------------------|--------|
| <i>Betula lenta</i> L.              | Black (sweet) birch          | 3.19                                             | 10.90% | 1.05                                                 | 22.60% |
| <i>Liriodedron tulipifera</i> L.    | Tulip (yellow) poplar        | 6.94                                             | 23.80% | 0.81                                                 | 17.50% |
| <i>Quercus alba</i> L.              | White oak                    | 5.09                                             | 17.50% | 0.65                                                 | 14.00% |
| <i>Rhododendron maximum</i> L.      | Great (rosebay) rhododendron | 4.39                                             | 15.10% | 0.6                                                  | 12.90% |
| <i>Acer rubrum</i> L.               | Red maple                    | 2.18                                             | 7.50%  | 0.44                                                 | 9.50%  |
| <i>Nyssa sylvatica</i> Marsh.       | Blackgum                     | 2.06                                             | 7.10%  | 0.33                                                 | 7.10%  |
| <i>Oxydendrum arboreum</i> L. (DC.) | Sourwood                     | 1.89                                             | 6.50%  | 0.27                                                 | 5.80%  |
| <i>Carya</i> spp.                   | Hickory species              | 0.8                                              | 2.70%  | 0.13                                                 | 2.80%  |
| <i>Fagus grandifolia</i> Ehrh.      | American beech               | 0.62                                             | 2.10%  | 0.1                                                  | 2.20%  |
| <i>Quercus velutina</i> Lam.        | Black oak                    | 0.46                                             | 1.60%  | 0.08                                                 | 1.70%  |
| <i>Cornus florida</i> L.            | Flowering dogwood            | 0.32                                             | 1.10%  | 0.05                                                 | 1.10%  |
| <i>Kalmia latifolia</i> L.          | Mountain laurel              | 0.25                                             | 0.90%  | 0.04                                                 | 0.90%  |
| <i>Carpinus caroliniana</i> Walter  | American hornbeam            | 0.19                                             | 0.70%  | 0.03                                                 | 0.60%  |
| <i>Quercus rubra</i> L.             | Red oak                      | 0.17                                             | 0.60%  | 0.02                                                 | 0.40%  |
| <i>Fraxinus americana</i> L.        | White ash                    | 0.14                                             | 0.50%  | 0.02                                                 | 0.40%  |
| <i>Tsuga canadensis</i> L.          | Eastern hemlock              | 0.31                                             | 1.10%  | 0.01                                                 | 0.20%  |
| <i>Pinus strobus</i> L.             | Eastern white pine           | 0.08                                             | 0.30%  | 0.01                                                 | 0.20%  |
| <i>Magnolia fraseri</i> Walter      | Mountain (Fraser) magnolia   | 0.05                                             | 0.20%  | <0.01                                                | <0.2%  |
| <i>Ilex opaca</i> Aiton             | American holly               | 0.02                                             | 0.10%  | <0.01                                                | <0.2%  |
| TOTAL                               |                              | 29.14                                            |        | 4.64                                                 |        |

136

### 137 **S3. Above-canopy Gradient Flux Measurements**

138

139 During the 2016 summer intensive a total of 19 vertical concentration profiles for reactive nitrogen compounds were  
 140 measured during daytime (typically 0800 – 1700) using a glass annular denuder/filter pack (URG Corporation, Chapel  
 141 Hill, NC) system as described in Section 2.2.2. The above canopy concentration gradients for HNO<sub>3</sub> and NH<sub>3</sub> were  
 142 obtained from the measurements at 43 m and 34.6 m and the deposition fluxes were calculated by the MBR method.  
 143 There were three and two profiles for HNO<sub>3</sub> and NH<sub>3</sub>, respectively, in which the measurements at 34.6 m were missing  
 144 or of poor quality. In these cases, the measurements at a lower level (32.0 m) were used to calculate the concentration  
 145 gradient, although they may suffer larger uncertainty due to greater influence of roughness sublayer (canopy height =  
 146 30 m). There are one and four concentration profiles for HNO<sub>3</sub> and NH<sub>3</sub>, respectively, exhibiting counter-gradient  
 147 phenomenon (i.e., emission) above canopy. The sample durations of the concentration profiles were typically 3 or 4  
 148 hours. The hourly *K<sub>t</sub>* values were first calculated from the hourly heat flux and temperature gradient measurements  
 149 and then averaged for the 3-4 hour sample period after omitting obvious outliers (points > 3 scaled median absolute  
 150 deviation (MAD) away from the median).

151



**Table S2. Summary of resistance formulas implemented in STAGE.**

| Resistance component             | Formulation                                                                                                                                                                                                                                                                                                                                                                         |
|----------------------------------|-------------------------------------------------------------------------------------------------------------------------------------------------------------------------------------------------------------------------------------------------------------------------------------------------------------------------------------------------------------------------------------|
| Aerodynamic resistance           | $R_a = u/u_*^2$                                                                                                                                                                                                                                                                                                                                                                     |
| Leaf boundary layer resistance   | $R_{bl} = \frac{\nu}{u_* D_c} \left( \frac{u_* l}{\nu LAI^2} \right)^{1/3}$                                                                                                                                                                                                                                                                                                         |
| Stomatal resistance              | $R_s = \frac{r_{s,min}}{LAI f_{PAR} f_T f_{vpd} f_w} \frac{D_{H_2O}}{D_c} + \frac{1}{LAI (H^*/3000 + 100 f_0)}$                                                                                                                                                                                                                                                                     |
| Cuticular resistances            | $R_{cut} = \left[ LAI \left( \frac{f_{wetleaf}}{R_{cut,wet}} + \frac{1 - f_{wetleaf}}{R_{cut,dry}} \right) \right]^{-1}$ <p>For NH<sub>3</sub>, <math>R_{cut,dry} = R_{cut,min} e^{\alpha_{cut}(100-RH)}</math></p> <p>For other reactive N compounds, <math>R_{cut,dry} = R_{cut0} a_0 / f_{rel}</math></p> $R_{cut,wet} = R_{mt} + R_{mt} / (W_L H^*)$ $R_{mt} = (k_{mt} r)^{-1}$ |
| Total ground resistance          | $R_g = R_{inc} + R_{bg} + R_{soil}$                                                                                                                                                                                                                                                                                                                                                 |
| In-canopy aerodynamic resistance | $R_{inc} = R_a (e^{0.5 LAI} - 1)$                                                                                                                                                                                                                                                                                                                                                   |
| Ground boundary layer resistance | $R_{bg} = \frac{\nu / D_c - \ln(\delta_0 / z_1)}{k u_{*g}}$                                                                                                                                                                                                                                                                                                                         |
| Soil resistance                  | <p>For NH<sub>3</sub>, <math>R_{soil} = L_{dry} / D</math></p> <p>For other reactive N compounds,</p> $R_{soil} = \left( \frac{f_{wetsoil}}{R_{soil,wet}} + \frac{1 - f_{wetsoil}}{R_{soil,dry}} \right)^{-1}$ $R_{soil,dry} = R_{soil0} a_0 / f_{rel}$ $R_{soil,wet} = R_{mt} + R_{mt} / (W_L H^*)$                                                                                |

153 Note.  $u$  = mean wind speed;  $u_*$  = friction velocity;  $\nu$  = kinematic viscosity of air;  $D_c$  = molecular diffusivity of a  
154 specific gas;  $l$  = length scale over which the viscous sub-layers are permitted, which is a typical leaf width;  $LAI$  =  
155 leaf area index;  $r_{s,min}$  = minimum leaf stomatal resistance for water vapor;  $f_{PAR}$  = environmental stress function of  
156 radiation;  $f_T$  = environmental stress function of temperature;  $f_{vpd}$  = environmental stress function of humidity;  $f_w$  =  
157 environmental stress functions of leaf water potential;  $D_{H_2O}$  = molecular diffusivities for water vapor;  $H^*$  = effective  
158 Henry's Law constant;  $f_0$  = reactive factor;  $f_{wetleaf}$  = fraction of wet canopy leaf;  $R_{cut,min}$  = minimum cuticular  
159 resistance of NH<sub>3</sub>;  $\alpha_{cut}$  = an empirical factor;  $RH$  = relative humidity;  $R_{cut0}$  = reference value for cuticular resistance;  
160  $a_0$  = a constant value;  $f_{rel}$  = relative reactivity;  $W_L$  = liquid water content fraction;  $k_{mt}$  = mass transfer coefficient of a

161 specific gas;  $r$  = droplet radius;  $\delta_0$  = distance above ground where the eddy diffusivity is equal to molecular  
162 diffusivity;  $z_l$  = upper height of logarithmic profile that forms above ground;  $u_{*g}$  = friction velocity at ground  
163 level;  $L_{dry}$  = soil dry layer thickness;  $D$  = gas diffusivity within soil;  $f_{wetsoil}$  = fraction of wet soil surface;  $R_{soil0}$  =  
164 reference value for soil resistance.  
165

#### 166 **S4. Canopy Physical Characteristics**

167  
168 Canopy total leaf area ( $m^2 m^{-2}$ ) was estimated along a 370 m transect during the spring and summer 2016 intensives  
169 using a wide-angle canopy imager (CID Bio-science CI-110 Plant Canopy Imager) at an average spacing of 28 m  
170 between 15 image locations (Breda, 2003). The transect origin was randomly selected within the Coweeta EFT  
171 footprint, directed from the northeast to the southwest of the tower. The CI-110 (Software v1.1.71) estimates plant  
172 area index (PAI) through a gap-fraction inversion procedure (Campbell and Norman, 1998). PAI is a whole tree index,  
173 including branches, stem and leaf components of a tree. To avoid sampling and optical errors associated with view  
174 angles close to zenith and the horizon, a  $30^\circ - 60^\circ$  zenith angle range was selected for analysis (Leblanc et al., 2005).  
175 Early morning and late evening collections ensured diffuse light conditions necessary for consistent exposure across  
176 the entire image. A species-specific woody-to-total (W:T) correction was applied to the *in situ* PAI to arrive at leaf  
177 area index (LAI) (Iiames et al., 2008). The CI-110 LAI estimates were then calibrated to LAI estimated using tree-  
178 specific allometric equations developed through destructive sampling in the Coweeta basin (Martin et al., 1998). These  
179 equations were then applied to forest stand measurements (species, density, size class) within the tower footprint to  
180 estimate LAI (Oishi et al., 2018; Table S1). The allometry based estimate of peak summer LAI ( $4.64 m^2 m^{-2}$ ) shown  
181 in Table S1 was used to adjust both the CID measurements and the MODIS LAI estimates as described below.  
182 The MODerate resolution Imaging Spectroradiometer (MODIS) global LAI product (MCD15A2H) was used to  
183 develop a continuous time series of LAI for deposition modeling. MODIS LAI estimates are generated daily at a 500  
184 m spatial resolution and each data point covers an 8-day period. The primary MODIS algorithm solves a 3-  
185 dimensional radiative-transfer model using atmosphere-corrected MODIS spectral surface reflectance and biome  
186 identification (Myneni et al., 2002). LAI for the eddy flux tower (EFT, Figure 1, Table 1) location was estimated  
187 from values of the surrounding four grid points by using inverse distance weighted interpolation. Raw MODIS data  
188 were corrected for MODIS QC, including Cloud State, Confidence Score, Snow\_Ice, Aerosol, Cirrus, Internal\_Cloud  
189 Mask, and Cloud\_Shadow flags then smoothed and gapfilled. After these processing steps, the summer  
190 maximum MODIS LAI at the tower site was  $5.62 m^2 m^{-2}$ , which is higher than the allometry base estimate of  $4.64 m^2$   
191  $m^{-2}$  (Oishi et al., 2018) described above. A ratio of 0.83 was applied to scale the summer MODIS LAI to the allometry  
192 based estimate. The minimum MODIS LAI at the tower site was  $0.5 m^2 m^{-2}$ , which is close to the allometry based LAI  
193 estimate for *Rhododendron maximum L.* ( $0.6 m^2 m^{-2}$ ) shown in Table S1 and was therefore not adjusted. The daily  
194 time series of MODIS LAI used for deposition modeling is shown in Figure S6 along with the spring and summer  
195 CID transect measurements of total LAI described above. The CID measurements are included to illustrate variability  
196 in LAI across the landscape surrounding the tower.  
197

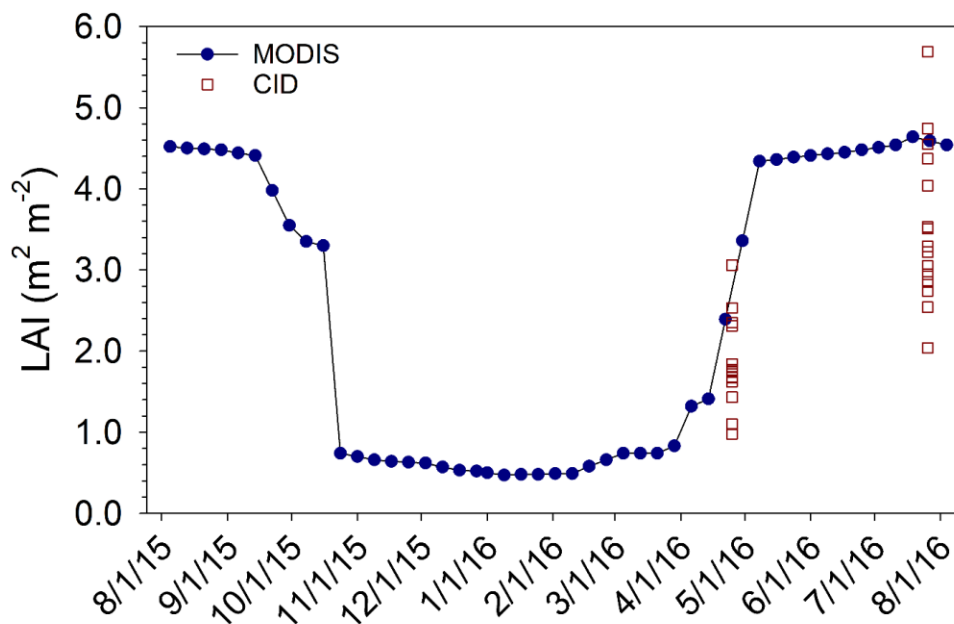

198

199 **Figure S6. Time series of MODIS LAI used for deposition modeling and transect CID LAI measurements.**

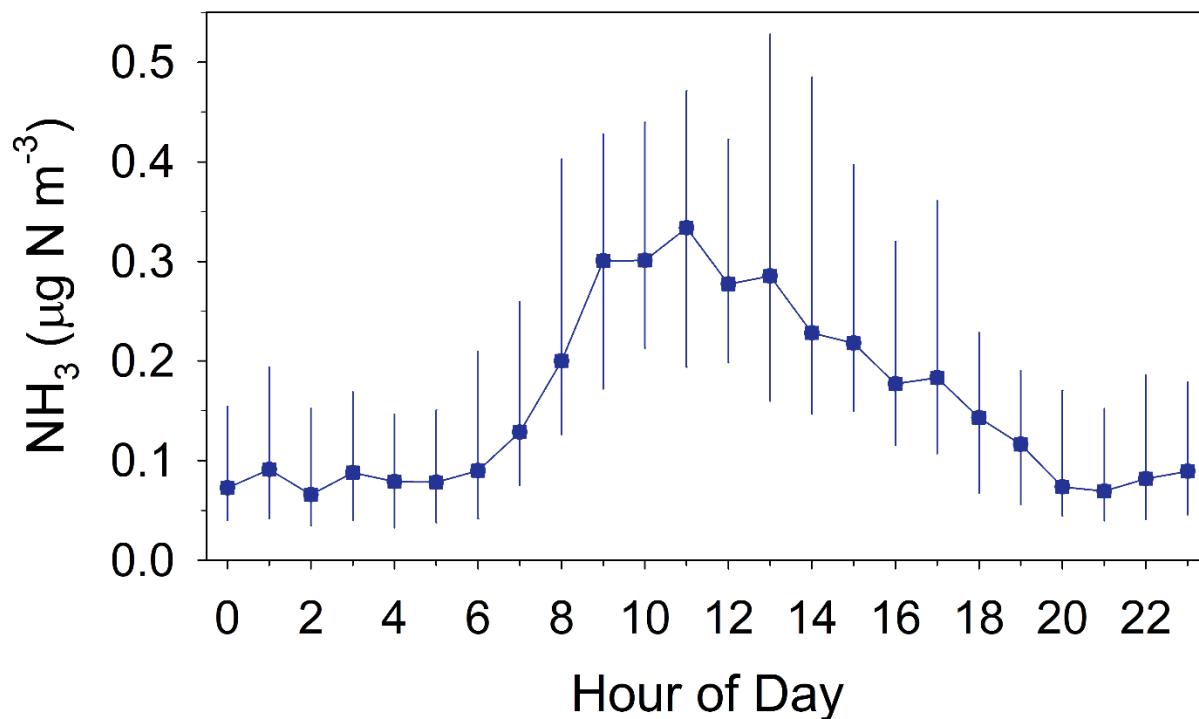

200

201 **Figure S7. Diel profile of  $\text{NH}_3$  concentration measured by the MARGA. Data from spring and summer 2016**  
 202 **intensives are combined. Observations represent median hourly concentration and bars represent**  
 203 **interquartile range (~ 60 observations in each hourly bin).**

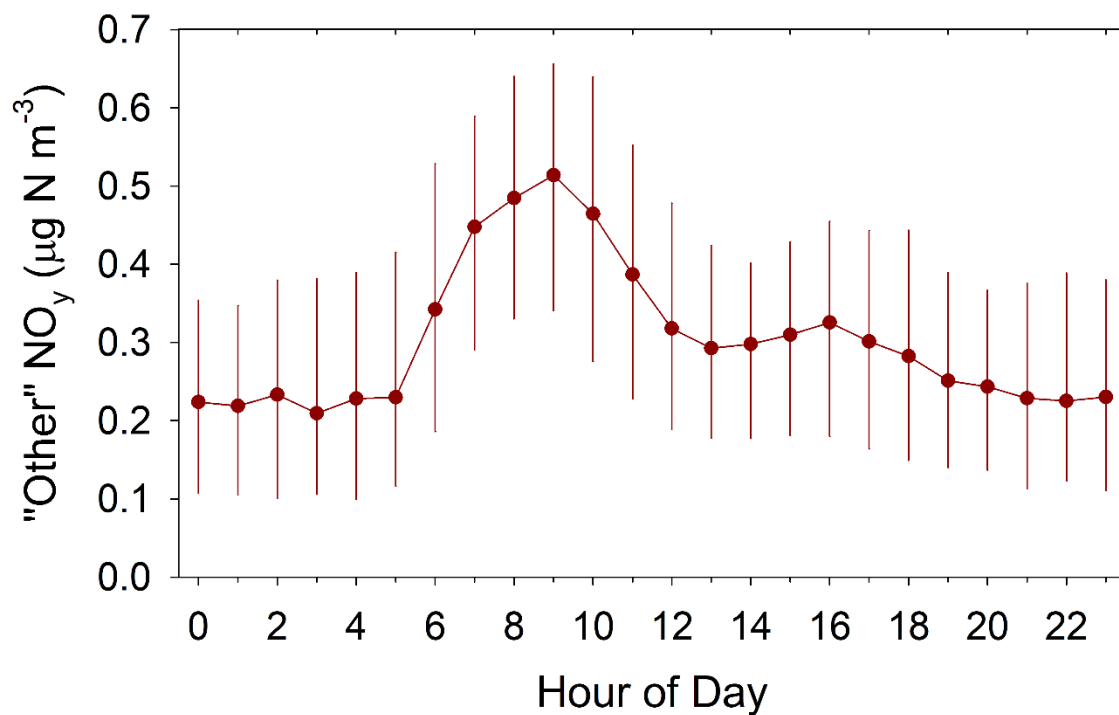

204

205 **Figure S8. Diel profile of measured “Other” NO<sub>y</sub> (i.e., NO<sub>y</sub> – HNO<sub>3</sub> – ΣPN – ΣAN). Observations represent**  
 206 **median hourly concentration and bars represent interquartile range.**

207

208

209

210

211

212

213

214

215

216

217

218

219

220

221

222

223

224

225

226 **Table S3. Summary of options used in the Community Multi-scale Air Quality (CMAQ V5.2.1) model and**  
 227 **coupled Weather Research and Forecasting (WRF) meteorological model.**  
 228

|                             |                                                                  |
|-----------------------------|------------------------------------------------------------------|
| <b>WRF Model options</b>    |                                                                  |
| WRF version                 | V3.8                                                             |
| Land cover data set         | NLCD 2011                                                        |
| Land-surface model          | Pleim-Xiu                                                        |
| Data assimilation           | Four-Dimensional Data Analysis (FDDA) with no nudging in the PBL |
| Microphysics module         | Morrison double-moment                                           |
| Radiation module            | Rapid Radiative Transfer Model Global (RRTMG)                    |
| Convective parameterization | Kain-Fritsch                                                     |
| Lightning data assimilation | Yes                                                              |
| MCIP post-processing        | V4.3                                                             |
| <b>CMAQ Model options</b>   |                                                                  |
| CMAQ version                | V5.2.1                                                           |
| Chemical mechanism          | CB6r3                                                            |
| Aerosol module              | CMAQ Aerosol Module version 6 (AE6)                              |
| Deposition module           | M3DRY                                                            |
| Lightning NOx               | Yes                                                              |
| Bidirectional NH3 flux      | Yes                                                              |
| Emissions platform          | 2015fd                                                           |
| Boundary conditions         | CMAQ v5.2 hemispheric model                                      |

229

230 **Table S4. Summary of NH<sub>4</sub><sup>+</sup>, NO<sub>3</sub><sup>-</sup>, NO<sub>2</sub><sup>-</sup>, and WSON concentrations in precipitation (μg N L<sup>-1</sup>) and %**  
 231 **contribution to WSTN. N = 52 observations.**  
 232

|                                       |                              | Mean  | Median | S.D.  | Q1   | Q3    | Min. | Max.   |
|---------------------------------------|------------------------------|-------|--------|-------|------|-------|------|--------|
| Concentration<br>μg N L <sup>-1</sup> | NH <sub>4</sub> <sup>+</sup> | 204.6 | 130.1  | 263.5 | 66.0 | 297.0 | 16.0 | 1808.9 |
|                                       | NO <sub>3</sub> <sup>-</sup> | 147.9 | 133.9  | 109.2 | 71.7 | 176.0 | 15.7 | 611.4  |
|                                       | NO <sub>2</sub> <sup>-</sup> | 1.1   | 0.5    | 1.8   | 0.0  | 1.2   | 0.0  | 8.4    |
|                                       | WSON                         | 51.6  | 25.7   | 94.8  | 10.8 | 53.6  | 0.1  | 559.6  |
| %WSTN                                 | NH <sub>4</sub> <sup>+</sup> | 47.0  | 46.8   | 8.3   | 41.0 | 51.9  | 26.9 | 73.9   |
|                                       | NO <sub>3</sub> <sup>-</sup> | 41.7  | 42.2   | 8.3   | 36.3 | 46.7  | 21.0 | 58.7   |
|                                       | NO <sub>2</sub> <sup>-</sup> | 0.3   | 0.2    | 0.5   | 0.0  | 0.4   | 0.0  | 2.5    |
|                                       | WSON                         | 11.0  | 9.4    | 7.7   | 6.1  | 13.8  | 0.1  | 38.0   |

233

234 **Table S5. Summary of seasonal and annual measured NO<sub>y</sub>, HNO<sub>3</sub>, ΣPN, ΣAN concentrations (µg N m<sup>-3</sup>). S.D.**  
 235 **represents 1 standard deviation, Q1 and Q3 represent 1<sup>st</sup> and 3<sup>rd</sup> quartiles (interquartile range), respectively,**  
 236 **and N represents the number of observations.**  
 237

|               | <b>Period</b> | <b>NO<sub>y</sub></b> | <b>HNO<sub>3</sub></b> | <b>ΣPN</b> | <b>ΣAN</b> |
|---------------|---------------|-----------------------|------------------------|------------|------------|
| <b>Mean</b>   | <i>Winter</i> | 0.749                 | 0.065                  | 0.045      | 0.042      |
|               | <i>Spring</i> | 0.667                 | 0.120                  | 0.068      | 0.056      |
|               | <i>Summer</i> | 0.341                 | 0.067                  | 0.053      | 0.055      |
|               | <i>Fall</i>   | 0.425                 | 0.040                  | 0.046      | 0.036      |
|               | <i>Annual</i> | 0.553                 | 0.076                  | 0.055      | 0.049      |
| <b>Median</b> | <i>Winter</i> | 0.626                 | 0.042                  | 0.033      | 0.029      |
|               | <i>Spring</i> | 0.597                 | 0.071                  | 0.053      | 0.047      |
|               | <i>Summer</i> | 0.299                 | 0.032                  | 0.041      | 0.047      |
|               | <i>Fall</i>   | 0.351                 | 0.019                  | 0.033      | 0.026      |
|               | <i>Annual</i> | 0.463                 | 0.039                  | 0.039      | 0.037      |
| <b>S.D.</b>   | <i>Winter</i> | 0.543                 | 0.066                  | 0.039      | 0.042      |
|               | <i>Spring</i> | 0.364                 | 0.128                  | 0.058      | 0.042      |
|               | <i>Summer</i> | 0.216                 | 0.076                  | 0.044      | 0.040      |
|               | <i>Fall</i>   | 0.308                 | 0.050                  | 0.038      | 0.033      |
|               | <i>Annual</i> | 0.416                 | 0.093                  | 0.047      | 0.041      |
| <b>Q1</b>     | <i>Winter</i> | 0.413                 | 0.018                  | 0.018      | 0.015      |
|               | <i>Spring</i> | 0.396                 | 0.026                  | 0.026      | 0.024      |
|               | <i>Summer</i> | 0.165                 | 0.013                  | 0.023      | 0.025      |
|               | <i>Fall</i>   | 0.188                 | 0.008                  | 0.018      | 0.014      |
|               | <i>Annual</i> | 0.264                 | 0.015                  | 0.021      | 0.019      |
| <b>Q3</b>     | <i>Winter</i> | 0.924                 | 0.093                  | 0.060      | 0.053      |
|               | <i>Spring</i> | 0.866                 | 0.180                  | 0.097      | 0.077      |
|               | <i>Summer</i> | 0.470                 | 0.100                  | 0.072      | 0.078      |
|               | <i>Fall</i>   | 0.566                 | 0.054                  | 0.065      | 0.048      |
|               | <i>Annual</i> | 0.725                 | 0.107                  | 0.075      | 0.067      |
| <b>N</b>      | <i>Winter</i> | 2002                  | 1884                   | 1783       | 1773       |
|               | <i>Spring</i> | 2108                  | 2016                   | 1836       | 1825       |
|               | <i>Summer</i> | 2105                  | 1956                   | 2049       | 2023       |
|               | <i>Fall</i>   | 1477                  | 1379                   | 1233       | 1229       |
|               | <i>Annual</i> | 7692                  | 7235                   | 6901       | 6850       |

238  
 239  
 240  
 241  
 242

243 **Table S6. Mean seasonal and annual percent (%) contribution of measured HNO<sub>3</sub>, ΣPN, ΣAN, and “Other”**  
 244 **compounds to total NO<sub>y</sub>. Other NO<sub>y</sub> is calculated at NO<sub>y</sub> – HNO<sub>3</sub> – ΣPN – ΣAN. Number of hourly**  
 245 **observations (N) is also shown.**  
 246

|               | Other NO <sub>y</sub> | HNO <sub>3</sub> | ΣPN  | ΣAN  | N    |
|---------------|-----------------------|------------------|------|------|------|
| <i>Winter</i> | 75.8                  | 8.6              | 8.1  | 7.5  | 1723 |
| <i>Spring</i> | 61.7                  | 16.0             | 11.4 | 11.0 | 1777 |
| <i>Summer</i> | 47.1                  | 16.2             | 16.7 | 20.0 | 1925 |
| <i>Fall</i>   | 68.5                  | 8.6              | 12.1 | 10.9 | 1160 |
| <i>Annual</i> | 62.3                  | 12.8             | 12.2 | 12.7 | 6585 |

247

248 **Table S7. Summary of NH<sub>4</sub><sup>+</sup>, NO<sub>3</sub><sup>-</sup>, NO<sub>2</sub><sup>-</sup>, and WSON concentrations in Hi-Vol PM<sub>2.5</sub> samples and %**  
 249 **contribution to WSTN. N = 103 observations.**  
 250

|                                       |                              | Mean  | Median | S.D.  | Q1    | Q3    | Min.  | Max.  |
|---------------------------------------|------------------------------|-------|--------|-------|-------|-------|-------|-------|
| Concentration<br>μg N m <sup>-3</sup> | NH <sub>4</sub> <sup>+</sup> | 0.264 | 0.248  | 0.123 | 0.192 | 0.331 | 0.076 | 0.795 |
|                                       | NO <sub>3</sub> <sup>-</sup> | 0.004 | 0.003  | 0.004 | 0.002 | 0.005 | 0.000 | 0.020 |
|                                       | NO <sub>2</sub> <sup>-</sup> | 0.001 | 0.001  | 0.001 | 0.000 | 0.001 | 0.000 | 0.007 |
|                                       | WSON                         | 0.037 | 0.026  | 0.036 | 0.010 | 0.054 | 0.000 | 0.140 |
| %WSTN                                 | NH <sub>4</sub> <sup>+</sup> | 86.8  | 89.5   | 10.2  | 81.4  | 94.7  | 51.4  | 100.0 |
|                                       | NO <sub>3</sub> <sup>-</sup> | 1.4   | 0.9    | 1.4   | 0.6   | 1.8   | 0     | 7.0   |
|                                       | NO <sub>2</sub> <sup>-</sup> | 0.3   | 0.2    | 0.4   | 0.1   | 0.3   | 0     | 3.6   |
|                                       | WSON                         | 11.5  | 9.1    | 10.0  | 3.9   | 17.5  | 0     | 45.4  |



251 **Table S8. Statistical summary of green leaf, senescent leaf and litter tissue chemistry along with  $\Gamma$  calculated**  
 252 **from tissue chemistry.**  
 253

|                  |                                | Mean  | S.D.   | Median | P25  | P75   | Min  | Max    | N  |
|------------------|--------------------------------|-------|--------|--------|------|-------|------|--------|----|
| Green Leaves     | pH                             | 4.7   | 0.7    | 4.6    | 4.2  | 5.4   | 3.0  | 6.3    | 75 |
|                  | NH <sub>4</sub> <sup>+</sup> * | 66.3  | 65.6   | 47.0   | 12.7 | 105.0 | 0.1  | 294.0  | 75 |
|                  | $\Gamma$                       | 267.0 | 630.4  | 35.8   | 10.3 | 171.0 | 0.0  | 4070.0 | 75 |
| Senescent Leaves | pH                             | 4.6   | 0.6    | 4.6    | 4.2  | 4.9   | 3.5  | 5.7    | 21 |
|                  | NH <sub>4</sub> <sup>+</sup> * | 346.2 | 338.0  | 186.0  | 72.7 | 637.0 | 23.5 | 1110.0 | 21 |
|                  | $\Gamma$                       | 784.5 | 1698.8 | 113.0  | 52.2 | 525.0 | 3.4  | 7370.0 | 21 |
| Litter           | pH                             | 5.1   | 0.6    | 5.0    | 4.5  | 5.5   | 3.9  | 6.1    | 65 |
|                  | NH <sub>4</sub> <sup>+</sup> * | 44.6  | 24.4   | 36.8   | 26.4 | 58.2  | 11.5 | 104.7  | 65 |
|                  | $\Gamma$                       | 314.7 | 464.7  | 69.3   | 26.0 | 494.2 | 4.9  | 2197.2 | 65 |

\* $\mu\text{g NH}_4^+$  g fresh tissue<sup>-1</sup>

254  
 255 **Table S9. Median statistics and number of observations of tissue chemistry for individual green leaf samples**  
 256 **by species. Note single observations for Sassafras and Eastern Hemlock.**  
 257

| Scientific Name                     | Common Name                  | N | pH  | NH <sub>4</sub> <sup>+</sup> * | $\Gamma$ |
|-------------------------------------|------------------------------|---|-----|--------------------------------|----------|
| <i>Acer rubrum</i> L.               | Red maple                    | 9 | 4.2 | 156.0                          | 46.4     |
| <i>Betula</i> spp.                  | Birch species                | 1 | 3.9 | 7.1                            | 1.0      |
| <i>Carya</i> spp.                   | Hickory species              | 5 | 4.4 | 93.9                           | 44.2     |
| <i>Fagus grandifolia</i> Ehrh.      | American beech               | 6 | 4.7 | 20.3                           | 29.7     |
| <i>Ilex opaca</i> Aiton             | American holly               | 3 | 5.4 | 110.0                          | 613.0    |
| <i>Kalmia latifolia</i> L.          | Mountain laurel              | 4 | 5.2 | 5.6                            | 32.9     |
| <i>Liriodendron tulipifera</i> L.   | Tulip (yellow) poplar        | 7 | 5.7 | 129.0                          | 1750.0   |
| <i>Magnolia fraseri</i> Walter      | Mountain (Fraser) magnolia   | 3 | 5.6 | 23.7                           | 313.0    |
| <i>Oxydendrum arboreum</i> L. (DC.) | Sourwood                     | 4 | 3.2 | 6.4                            | 0.3      |
| <i>Pinus strobus</i> L.             | Eastern white pine           | 3 | 4.1 | 21.7                           | 6.8      |
| <i>Quercus alba</i> L.              | White oak                    | 9 | 4.5 | 25.3                           | 23.5     |
| <i>Quercus coccinea</i> L.          | Scarlet oak                  | 4 | 4.3 | 37.5                           | 13.4     |
| <i>Quercus prinus</i> L.            | Chestnut oak                 | 3 | 5.4 | 139.0                          | 719.0    |
| <i>Quercus velutina</i> Lam.        | Black oak                    | 5 | 4.5 | 52.6                           | 44.4     |
| <i>Rhododendron maximum</i> L.      | Great (rosebay) rhododendron | 7 | 5.2 | 4.2                            | 14.6     |
| <i>Sassafras albidum</i> (Nutt.)    | Sassafras                    | 1 | 5.8 | 91.9                           | 1090.0   |
| <i>Tsuga canadensis</i> L.          | Eastern hemlock              | 1 | 3.6 | 10.0                           | 0.8      |

\*NH<sub>4</sub><sup>+</sup> ( $\mu\text{g g fresh tissue}^{-1}$ )

258

259 **Table S10. Statistical summary of hourly modeled deposition velocities ( $\text{cm s}^{-1}$ ) for individual N compounds ( $N$   
 260  $= 8784$ ).**

|                              | Mean | S.D  | Median | Q1   | Q3   |
|------------------------------|------|------|--------|------|------|
| NH <sub>3</sub>              | 1.58 | 1.23 | 1.30   | 0.72 | 2.16 |
| NH <sub>4</sub> <sup>+</sup> | 0.08 | 0.09 | 0.05   | 0.03 | 0.10 |
| HNO <sub>3</sub>             | 3.13 | 1.99 | 2.75   | 1.63 | 4.22 |
| NO <sub>3</sub> <sup>-</sup> | 0.07 | 0.07 | 0.04   | 0.02 | 0.08 |
| NO <sub>2</sub>              | 0.16 | 0.21 | 0.07   | 0.03 | 0.15 |
| AN                           | 0.52 | 0.57 | 0.29   | 0.21 | 0.56 |
| PN                           | 0.32 | 0.15 | 0.26   | 0.21 | 0.39 |
| PON                          | 0.07 | 0.08 | 0.04   | 0.02 | 0.08 |

261  
 262 **S5. Sensitivity of Dry Deposition to Model Parameterizations**

263  
 264 Sensitivity tests of dry deposition model parameterizations are summarized in Table S11. Leaf area index is a key  
 265 model input, as fluxes of all species scale with the canopy surface area available for dry deposition. In our analysis  
 266 we use LAI derived from MODIS for the annual dry deposition simulation (Supplemental Figure S6). Ground-based  
 267 measurements of LAI along transects in the vicinity of the forest flux tower show large spatial variability, with  
 268 individual values scattering around the MODIS estimate. The sensitivity of the modeled dry deposition to LAI is  
 269 evaluated by adjusting LAI in the base case simulation by  $\pm 30\%$ , equivalent to the mean of the ground-based  
 270 observations  $\pm$  the relative standard deviation. Increasing LAI by 30% from the base case increases total dry  
 271 deposition by  $0.33 \text{ kg ha}^{-1}$  (+12.5%), increasing the contribution of dry to total deposition from 39.5% to 42.2%.  
 272 Decreasing LAI by 30% reduces total dry N deposition by  $0.38 \text{ kg ha}^{-1}$  (-14.4%), subsequently reducing the  
 273 contribution of dry to total deposition from 39.5% to 35.8%.

274 As the dominant deposition pathway for NH<sub>3</sub>, it is important to understand the sensitivity of the model results to the  
 275 cuticular resistance parameterization ( $R_{cut}$ , Table S2). The cuticular resistance for NH<sub>3</sub> is typically parameterized as  
 276 a function of LAI, surface wetness, and the amount of NH<sub>3</sub> dissolved in water residing on the cuticle surface (Pleim  
 277 et al., 2013) or its pH (van Hove et al., 1989). In STAGE,  $R_{cut}$  is specified for wet periods (i.e.,  $R_{cut,wei}$ ) (i.e., macroscale  
 278 wetness including rain and dew) and periods that are considered dry ( $R_{cut,dry}$ ) but will include microscale wetness (i.e.,  
 279 thin layers on the cuticle surface) at high relative humidity (RH) (Table S2). Here we restrict our analysis to the role  
 280 of  $R_{cut,dry}$ , as it dominates (78% of hourly periods)  $R_{cut}$ .  $R_{cut}$  cannot be measured directly, rather it is typically inferred  
 281 from night-time canopy-scale NH<sub>3</sub> flux measurements under the assumption that the stomatal flux pathway is closed  
 282 and the ground flux is negligible (Massad et al., 2010). Such datasets show a clear, generally non-linear, relationship  
 283 with RH, indicating a reduction in  $R_{cut,dry}$  as thin water layers form on the cuticle surface (Massad et al., 2010) at high  
 284 RH. The minimum cuticular resistance ( $R_{cut,min}$ ) demonstrates a relationship with pH of the cuticle surface water,  
 285 parameterized as the ratio of total acid to NH<sub>3</sub> in the atmosphere (i.e., acid ratio, Nemitz et al., 2001). Here we assume  
 286 an acid ratio of 1, yielding  $R_{cut,min} = 31.5$  (Massad et al., 2010). An empirical factor ( $\alpha_{cut}$ ) defines the form of the  
 287 exponential relationship between  $R_{cut,dry}$  and RH, thus exerting important control on the dynamics of  $F_{cut}$ .

288 Based on metanalysis of existing datasets, Massad et al. (2010) separate  $\alpha_{cut}$  by ecosystem type based on the  
289 expectation that the factors controlling the relationship between RH and formation of microscale water layers on the  
290 cuticle, such as hygroscopicity and aerosol uptake, will differ by plant species (Massad et al., 2010). For forests, the  
291 mean and standard deviation of  $\alpha_{cut}$  reported by Massad et al. (2010) are 0.0318 and 0.0179, respectively. In our  
292 analysis, the sensitivity of  $F_{net}$  to  $R_{cut,dry}$  is assessed by varying  $\alpha_{cut}$  by  $\pm 0.0179$ , equivalent to a change of  $\pm 56\%$ .  
293 Increasing  $\alpha_{cut}$  increases  $R_{cut,dry}$ , thereby decreasing  $\text{NH}_3$  dry deposition by  $0.28 \text{ kg N ha}^{-1}$  (-20.3%) relative to the base  
294 case. Total dry N deposition is reduced by 10.2%, subsequently reducing the contribution of dry to total deposition  
295 from 39.5% to 36.9%. Decreasing  $\alpha_{cut}$  decreases  $R_{cut,dry}$ , thereby increasing  $\text{NH}_3$  dry deposition by  $0.41 \text{ kg N ha}^{-1}$   
296 (29.7%) relative to the base case. Total dry N deposition increases by 15.9%, subsequently increasing the contribution  
297 of dry to total deposition from 39.5% to 43%.

298 Emission potentials ( $\Gamma$ ) of the ground and vegetation are key inputs to the model, as they govern the surface  
299 compensations points and subsequently the direction and magnitude of the component (e.g., ground and canopy) and  
300 net canopy-scale fluxes. As described above, parametrization of the leaf and litter emission potentials based on bulk  
301 tissue chemistry contains uncertainty. While the magnitude of the uncertainty is not known, the sensitivity of the net  
302 canopy-scale flux to  $\Gamma$  can be assessed by varying the litter ( $\Gamma_l$ ) and stomatal ( $\Gamma_s$ ) emission potentials together and  
303 individually within the IQR of the observations (Table S8) assuming that uncertainty is ultimately less than naturally  
304 observed variability. Simultaneously reducing  $\Gamma_l$  and  $\Gamma_s$  to their corresponding 25<sup>th</sup> percentiles increases net  $\text{NH}_3$  dry  
305 deposition by  $0.07 \text{ kg N ha}^{-1}$  (+5.1%) relative to the base case. Simultaneously increasing  $\Gamma_l$  and  $\Gamma_s$  to their  
306 corresponding 75<sup>th</sup> percentiles has a larger impact, decreasing  $\text{NH}_3$  dry deposition by  $0.65 \text{ kg N ha}^{-1}$  (-47.1%) relative  
307 to the base case. Total dry N deposition is reduced by 24.2%, subsequently reducing the contribution of dry to total  
308 deposition from 39.5% to 33.0%. Adjusting  $\Gamma_l$  and  $\Gamma_s$  individually within their respective IQR while holding the other  
309 constant reveals a similar pattern. Larger responses are observed by increasing rather than decreasing  $\Gamma_l$  and  $\Gamma_s$ .  
310 Individually increasing  $\Gamma_l$  to the 75th percentile reduces  $\text{NH}_3$  dry deposition by 37.0%, while increasing  $\Gamma_s$  reduces  
311  $\text{NH}_3$  dry deposition by 10.1%. This response reflects differences in the magnitude and variability of the measured  $\Gamma_l$   
312 and  $\Gamma_s$ .

313 The ground flux ( $F_g$ ) is controlled by  $\Gamma_g$  and the total ground resistance ( $R_g$ ), which is the sum of  $R_{inc}$ ,  $R_{bg}$  and soil  
314 ( $R_{soil}$ ) resistances (Table S2). For  $\text{NH}_3$ ,  $R_{soil}$  is a function of the length of the dry soil layer through which  $\text{NH}_3$   
315 originating from the soil solution must diffuse to the atmosphere (Sakaguchi and Zeng, 2009). As noted above,  
316 analysis of the soil and litter chemistry along with in-canopy profiles of  $\text{NH}_3$  air concentration suggests that it is more  
317 appropriate to set the ground emission potential to that of the litter rather than the much more acidic underlying soil.  
318 We do so acknowledging that the physical process by which  $\text{NH}_3$  diffuses from the litter layer to the atmosphere will  
319 differ from diffusion through the soil dry surface layer. However, while studies have investigated the potential role  
320 of leaf litter in  $\text{NH}_3$  air-surface exchange above forests (Hansen et al., 2013; 2015), a parameterization for a litter layer  
321 resistance ( $R_{litter}$ ) for forests has not been developed. Thus, we retain the current parameterization for  $R_{soil}$  and set  $\Gamma_g$   
322 =  $\Gamma_l$  to calculate compensation points and  $F_g$  in STAGE. To test the potential implications of substituting  $R_{litter}$  for  
323  $R_{soil}$ , we assess the impact to  $F_{net}$  of changing  $R_{soil}$  by a factor of  $\pm 2$ . Doubling  $R_{soil}$  or reducing it by half has a minor

324 effect on  $\text{NH}_3$  dry deposition equivalent to  $\pm \sim 0.02 \text{ kg N ha}^{-1}$  ( $\sim \pm 1.4\%$ ). This might be expected given that  $R_g$   
325 depends not only on  $R_{soil}$  but also  $R_{inc}$  and  $R_{bg}$ . On average,  $R_{inc}$ ,  $R_{bg}$ , and  $R_{soil}$  comprise 9.7%, 41.5%, and 48.8% of  $R_g$   
326 ( $= R_{inc} + R_{bg} + R_{soil}$ ) for  $\text{NH}_3$ . While development and implementation of a mechanistically representative  $R_{litter}$  to  
327 replace  $R_{soil}$  for forests is a necessary long-term goal, it is unlikely that it would dramatically alter the results presented  
328 here.

329 The final sensitivity scenarios relate to the assumption of the particle size distribution in the calculation of  $\text{NH}_4^+$ ,  $\text{NO}_3^-$ ,  
330 and PON fluxes. Three size distributions based on the data of Zhang et al. (2008) are shown in Supplemental Figure  
331 S10. The base STAGE model run assumes profile 1, which corresponds to the size distribution measured at clean  
332 sites of Zhang et al. (2008). Two more profiles (profile 2 and 3) were selected from the polluted sites for the purpose  
333 of sensitivity tests. Adopting profile 2 shifts the distribution to smaller sizes, increasing particulate  $V_d$  and subsequently  
334 increasing total dry N deposition but only by a very small amount ( $0.07 \text{ kg N ha}^{-1}$  or 2.7%). Adopting profile 3 shifts  
335 the distribution to larger sizes, decreasing particulate  $V_d$  and subsequently decreasing total dry N deposition by an  
336 even smaller amount (<1%). Given the already much smaller  $V_d$  of particles relative to gases, the model results are  
337 relatively insensitive to assumptions of particle size distribution assumed in the  $V_d$  parameterization.

338

**Table S11. Results of model sensitivity testing. Annual NH<sub>3</sub> dry deposition, total dry deposition, and total deposition (kg N ha<sup>-1</sup>) are reported, along with contribution (%) of NH<sub>3</sub> dry deposition to total deposition and contribution of dry deposition to total deposition, for combinations of alternative model parameterizations and inputs relative to the base model scenario.**

5

|                                                                     | NH <sub>3</sub> _dry<br>kg N ha <sup>-1</sup> | Dry<br>kg N ha <sup>-1</sup> | Total<br>kg N ha <sup>-1</sup> | NH <sub>3</sub> _dry<br>% of Total Dry | Dry<br>% of Total Wet + Dry |
|---------------------------------------------------------------------|-----------------------------------------------|------------------------------|--------------------------------|----------------------------------------|-----------------------------|
| Base                                                                | 1.38                                          | 2.64                         | 6.70                           | 52.1                                   | 39.5                        |
| LAI+30%                                                             | 1.58                                          | 2.97                         | 7.03                           | 53.4                                   | 42.2                        |
| LAI-30%                                                             | 1.13                                          | 2.26                         | 6.32                           | 49.8                                   | 35.8                        |
| R <sub>cut,dry+</sub>                                               | 1.10                                          | 2.37                         | 6.43                           | 46.5                                   | 36.9                        |
| R <sub>cut,dry-</sub>                                               | 1.79                                          | 3.06                         | 7.12                           | 58.5                                   | 43.0                        |
| Γ <sub>s,l</sub> = P <sub>25</sub>                                  | 1.45                                          | 2.72                         | 6.78                           | 53.4                                   | 40.1                        |
| Γ <sub>s,l</sub> = P <sub>75</sub>                                  | 0.73                                          | 2.00                         | 6.06                           | 36.6                                   | 33.0                        |
| Γ <sub>s</sub> = P <sub>50</sub> , Γ <sub>1</sub> = P <sub>25</sub> | 1.43                                          | 2.70                         | 6.76                           | 52.9                                   | 39.9                        |
| Γ <sub>s</sub> = P <sub>50</sub> , Γ <sub>1</sub> = P <sub>75</sub> | 0.87                                          | 2.14                         | 6.20                           | 40.6                                   | 34.5                        |
| Γ <sub>s</sub> = P <sub>25</sub> , Γ <sub>1</sub> = P <sub>50</sub> | 1.40                                          | 2.67                         | 6.73                           | 52.5                                   | 39.7                        |
| Γ <sub>s</sub> = P <sub>75</sub> , Γ <sub>1</sub> = P <sub>50</sub> | 1.24                                          | 2.51                         | 6.57                           | 49.4                                   | 38.2                        |
| R <sub>soilX2</sub>                                                 | 1.36                                          | 2.63                         | 6.69                           | 51.7                                   | 39.3                        |
| R <sub>soilX0.5</sub>                                               | 1.40                                          | 2.66                         | 6.73                           | 52.4                                   | 39.6                        |
| PSD = Profile 2                                                     |                                               | 2.71                         | 6.77                           |                                        | 40.0                        |
| PSD = Profile 3                                                     |                                               | 2.64                         | 6.70                           |                                        | 39.4                        |

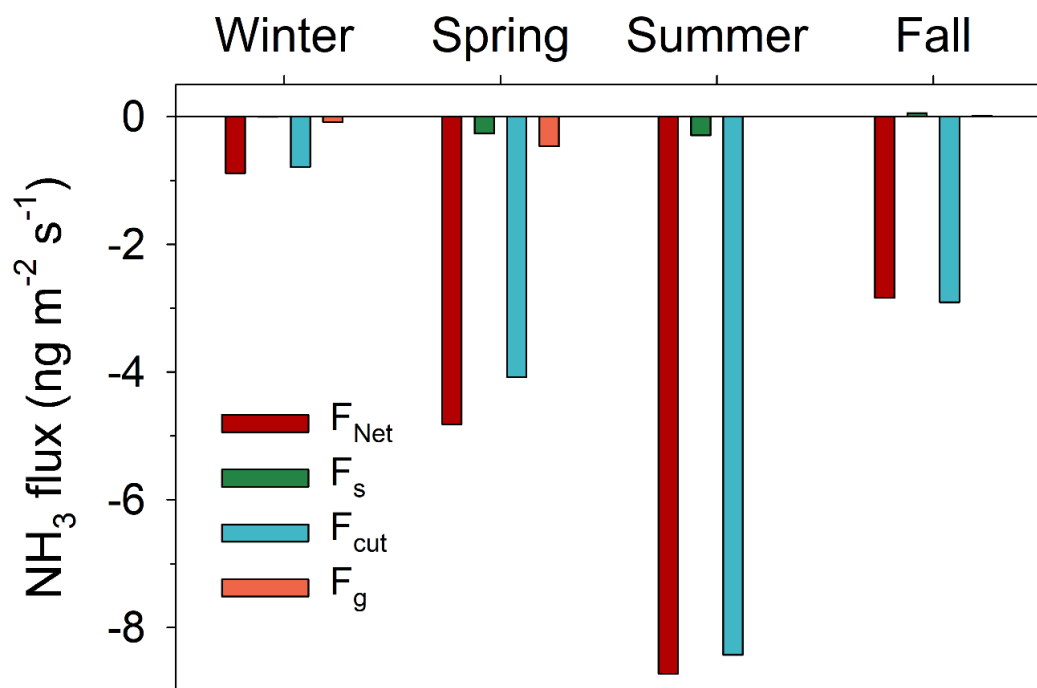

Figure S9. Seasonal mean net canopy-scale ( $F_{net}$ ) and component ( $F_s$  = stomatal,  $F_{cut}$  = cuticular,  $F_g$  = ground)  $\text{NH}_3$  fluxes from STAGE. Negative values indicate deposition.

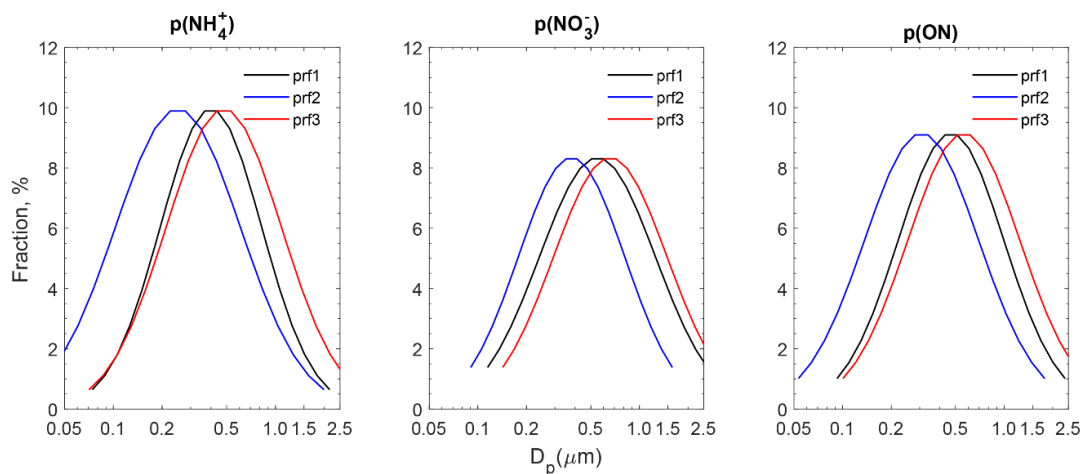

5 Figure S10. Particle size distributions used in the calculation of  $\text{NH}_4^+$ ,  $\text{NO}_3^-$  and PON fluxes (prf1) and alternative profiles used to test model sensitivity (prf2 and prf3). Particle diameter ( $D_p$ ) and corresponding fraction (%) of total particulate mass are shown. Note that the mass median aerodynamic diameter (MMAD) and geometric standard deviation (GSD) used to generate the size distributions for  $\text{NH}_4^+$  and  $\text{NO}_3^-$  were from  
 10 Table 5 of Zhang et al. (2008). PON was not measured at Zhang et al. (2008) and the values used here were taken as the mean of  $\text{NH}_4^+$  and  $\text{NO}_3^-$ .

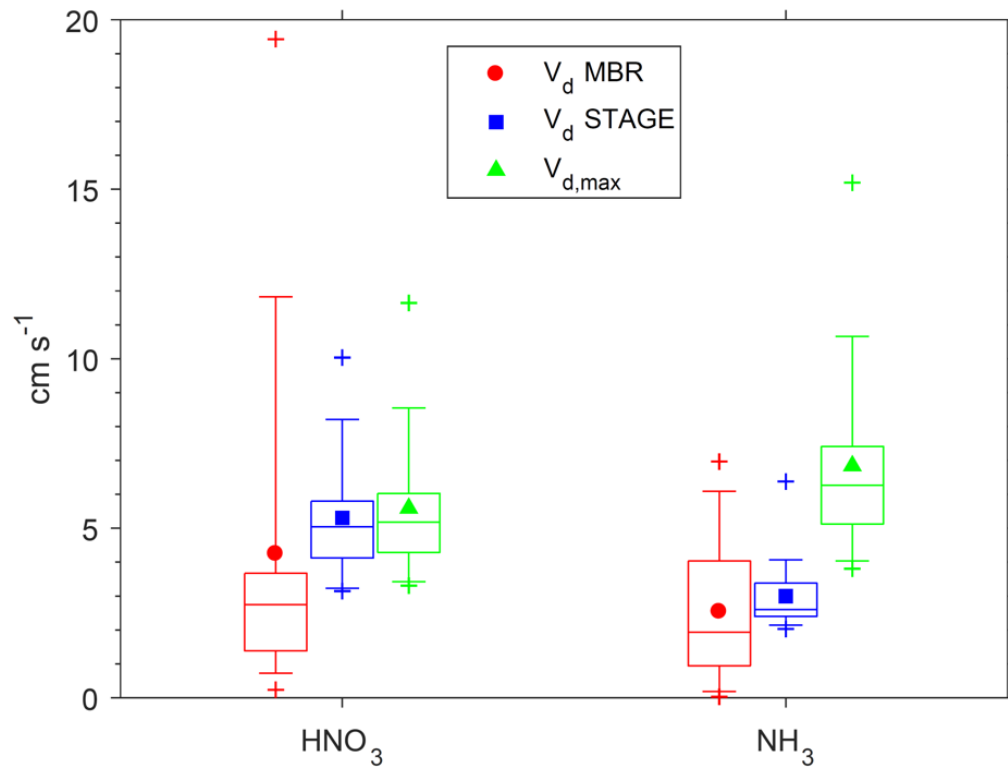

Figure S11. Box-plots of deposition velocity ( $V_d$ ) estimated by modified Bowen ratio (MBR), STAGE model, and maximum  $V_d$  as  $1/(R_a + R_b)$ .

## References

- Breda, N., 2003. Ground-based measurements of leaf area index: a review of methods, instruments and current controversies. *Journal of Experimental Botany*, 54, 2403-2417.
- Campbell, G.S., Norman, J.M., 1998. *An Introduction to Environmental Biophysics*. Springer, New York.
- 5 Hansen, K., Sørensen, L.L., Hertel, O., Geels, C., Skjøth, C.A., Jensen, B., Boegh, E., 2013. Ammonia emissions from deciduous forest after leaf fall. *Biogeosciences*, 10, 4577-4589.
- Hansen, K., Personne, E., Skjøth, C.A., Loubet, B., Ibrom, A., Jensen, R., Sorenson, L.L., Boegh, E., 2017. Investigation sources of measured forest-atmospheric ammonia fluxes using tow-layer bi-directional modelling. *Agricultural and Forest Meteorology*, 237-238, 80-94.
- 10 Iames, J., Congalton, R.G., Pilant, A., Lewis, T.E., 2008. Validation of an integrated estimation of Loblolly pine (*Pinus taeda* l.) leaf area index (LAI) utilizing two indirect optical methods in the southeastern United States. *Southern Journal of Applied Forestry*, 32, 101-110.
- Leblanc, S., Chen, J.M., Fernandes, R., Deering, D.W., Conley, A., 2005. Methodology comparison for canopy structure parameters extraction from digital hemispherical photography in boreal forests. *Agricultural and Forest Meteorology*, 129, 187-207.
- 15 Martin, J.G., Kloeppel, B.D., Schaefer, T.L., Kimbler, D.L., McNulty, S.G., 1998. Aboveground biomass and nitrogen allocation of ten deciduous southern Appalachian tree species. *Canadian Journal of Forest Research*, 28, 1648-1659.
- Massad, R.-S., Nemitz, E., Sutton, M., 2010. Review and parameterisation of bi-directional ammonia exchange between vegetation and the atmosphere. *Atmospheric Chemistry and Physics*, 10, 10359-10386.
- 20 Myneni, R.B., Hoffman, S., Knyazikhin, Y., Privette, J.L., Glassy, J., Tian, Y., Wang, Y., Song, X., Zhang, Y., Smith, G.R., Lotsch, A., Friedl, M., Morisette, J.T., Votava, P., Nemani, R.R. and Running, S.W., 2002. Global products of vegetation leaf area and fraction absorbed PAR from year one of MODIS data. *Remote Sensing of Environment*, 83, 214-231.
- 25 Nemitz, E., Milford, C., Sutton, M.A., 2001. A two-layer canopy compensation point model for describing bi-directional biosphere-atmosphere exchange of ammonia. *Quarterly Journal of the Royal Meteorological Society*, 127, 815-833.
- Oishi, A.C., Miniati, C.F., Novick, K.A., Brantley, S.T., Vose, J.M., Walker, J.T., 2018. Warmer temperatures reduce net carbon uptake, but not water use in a mature southern Appalachian forest. *Agricultural and Forest Meteorology*, 252, 269-282.
- 30 Pleim, J.E., Bash, J.O., Walker, J.T., Cooter, E.J., 2013. Development and evaluation of an ammonia bi-directional flux parameterization for air quality models. *Journal of Geophysical Research - Atmospheres*, 118, 3794-3806.
- Sakaguchi, K., Zeng, X., 2009. Effects of soil wetness, plant litter, and under-canopy atmospheric stability on ground evaporation in the Community Land Model (CLM3.5). *Journal of Geophysical Research - Atmospheres*, 114, D01107.
- 35 van Hove, L.W.A., Adema, E.H., Vredenberg, W.J., Pieters, G.A., 1989. A study of the adsorption of NH<sub>3</sub> and SO<sub>2</sub> on leaf surfaces. *Atmospheric Environment*, 23, 1479-1486
- Zhang, L., R. Vet, A. Wiebe, C. Mihele, B. Sukloff, E. Chan, M. D. Moran, S. Iqbal., 2008. Characterization of the size-segregated water-soluble inorganic ions at eight Canadian rural sites. *Atmospheric Chemistry and Physics*, 8, 7133-7151.
- 40
